# Supplementary material for: Gene-specific mitochondria dysfunctions in human TARDBP and C9ORF72 fibroblasts
Source: Springer Nature journal article supplement (doi:10.1186/s40478-016-0316-5), 2016-05-05
Supplement: MOESM1 [file 25665946]

## SUPPLEMENTARY DATA

**Supplementary Figure 1. Mitochondria morphology in mutant *TARDBP* and *C9ORF72* fibroblasts after 48 hours in galactose medium.** Representative confocal images of mitochondrial network in primary fibroblasts from three healthy controls (C1, C2, C3), three ALS patients carrying mutation in *TARDBP* gene (p.A382T; T1, T2, T3) and three ALS/FTD patients with pathological expansion of the hexanucleotide repeat in *C9ORF72* (C9.2, C9.3, C9.4) transfected with pDsRed2Mito construct. Bar, 10 $\mu$ m.

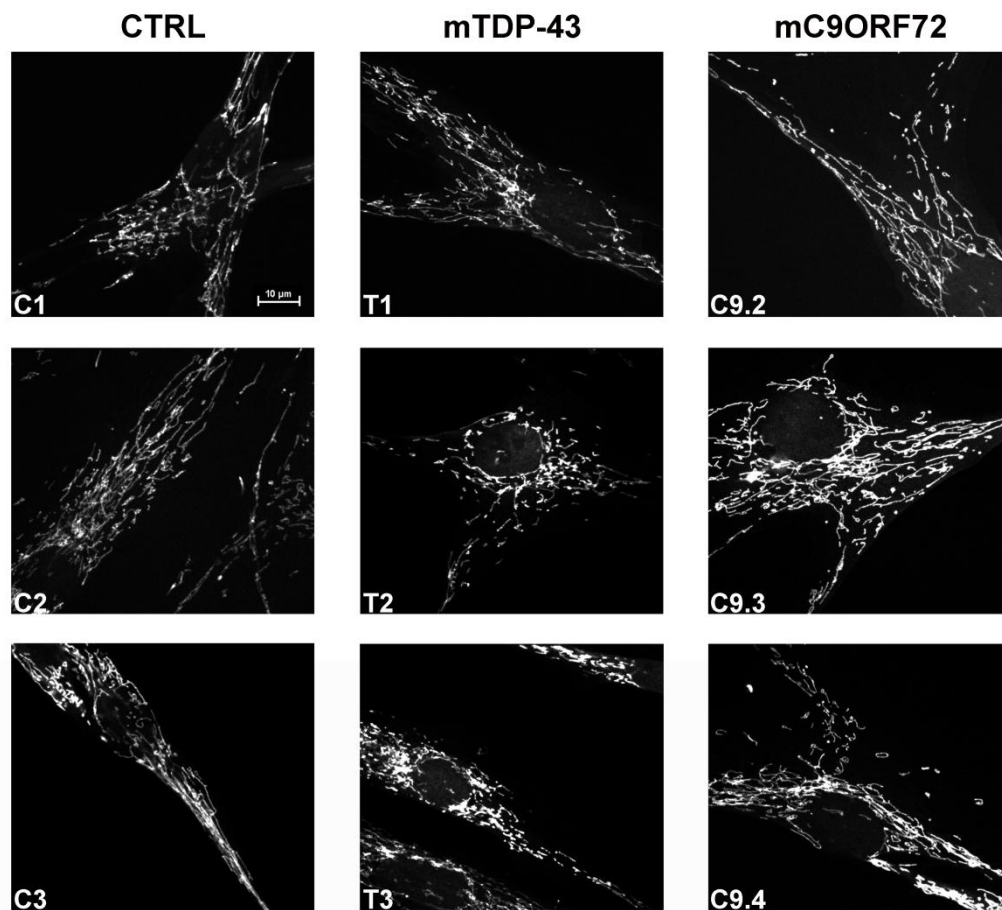

**Supplementary Figure 2. Mitochondria functionality in mutant *TARDBP* and *C9ORF72* fibroblasts.** Measurement of mitochondrial membrane potential by flow cytometry analysis of Mitotracker Red (MTR) positive fibroblasts (from 4 healthy controls, 3 *TARDBP* and 4 *C9ORF72* mutated patients) maintained in medium with galactose and without glucose. Median  $\pm$  SEM, n=3 different *DIV*; One-way ANOVA with Dunnett's multiple comparison test; \*\*p<0.01).

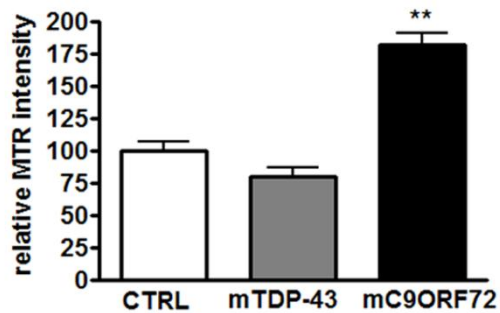

**Supplementary Figure 3. Analysis of mitochondria membrane potential in mutant *TARDBP* and *C9ORF72* fibroblasts in glycolytic conditions.** Measurement of mitochondrial (MMP) by flow cytometry analysis of TMRM-positive fibroblasts (4 healthy controls, 3 *TARDBP* and 4 *C9ORF72*), maintained in medium with 2 g/l glucose. Median  $\pm$  SEM, n=3 different *DIV*; One-way ANOVA with Dunnett's multiple comparison test).

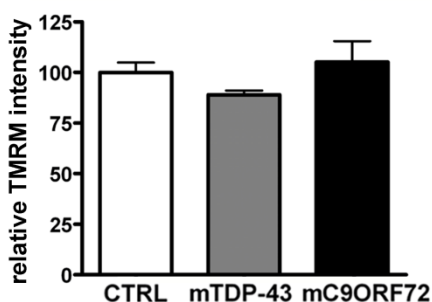

**Supplementary Figure 4. Analysis of mitochondria mass in mutant *TARDBP* and *C9ORF72* fibroblasts in glycolytic conditions.** Measurement of mitochondrial mass (MM) by flow cytometry analysis of Mitotracker green (MTG)-positive fibroblasts (4 healthy controls, 3 *TARDBP* and 4 *C9ORF72*), maintained in medium with 2 g/l glucose. Median  $\pm$  SEM, n=3 different *DIV*; One-way ANOVA with Dunnett's multiple comparison test).

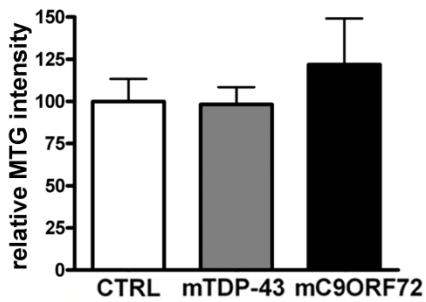

**Supplementary Figure 5. TDP-43 sub-cellular localization in *C9ORF72* fibroblasts after 48 hours in galactose medium.** Representative immunofluorescence images of TDP-43 (green) in primary fibroblasts from healthy controls (four) and ALS/FTD patients carrying mutation in *C9ORF72* gene (four), incubated with Mitotracker Red. Bar, 10  $\mu$ m.

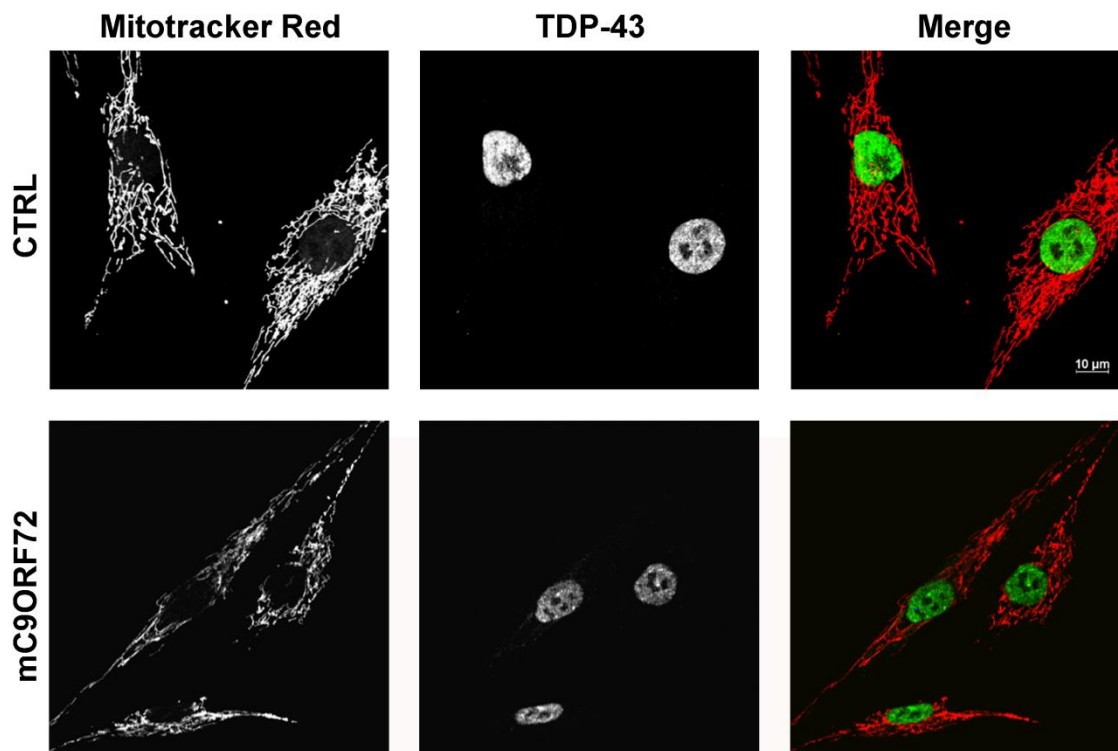

**Supplementary Table 1. Clinical features of healthy controls, *TARDBP*- and *C9ORF72*-mutated patients**

| <b>Patient ID</b> | <b>Sex</b> | <b>Age at biopsy</b> | <b>Gene</b>    | <b>Mutation</b> | <b>Diagnosis</b> | <b>Family history</b> | <b>Age at onset</b> | <b>Site of onset</b> | <b>Cognitive impairment</b> |
|-------------------|------------|----------------------|----------------|-----------------|------------------|-----------------------|---------------------|----------------------|-----------------------------|
| <b>C1</b>         | M          | 37                   | -              | -               | -                | -                     | -                   | -                    | -                           |
| <b>C2</b>         | M          | 46                   | -              | -               | -                | -                     | -                   | -                    | -                           |
| <b>C3</b>         | F          | 53                   | -              | -               | -                | -                     | -                   | -                    | -                           |
| <b>C4</b>         | M          | 62                   | -              | -               | -                | -                     | -                   | -                    | -                           |
| <b>T1</b>         | M          | 26                   | <i>TARDBP</i>  | p.A382T         | ALS              | No                    | 25                  | spinal               | No                          |
| <b>T2</b>         | M          | 56                   | <i>TARDBP</i>  | p.A382T         | ALS              | No                    | 54                  | spinal               | No                          |
| <b>T3</b>         | F          | 60                   | <i>TARDBP</i>  | p.A382T         | ALS              | No                    | 59                  | spinal               | No                          |
| <b>C9-1</b>       | F          | 57                   | <i>C9ORF72</i> | 1500 units      | ALS              | Yes (sister)          | 55                  | spinal               | No                          |
| <b>C9-2</b>       | M          | 64                   | <i>C9ORF72</i> | 1166 units      | ALS              | No                    | 61                  | spinal               | No                          |
| <b>C9-4</b>       | M          | 69                   | <i>C9ORF72</i> | >4000 units     | ALS              | No                    | 66                  | spinal               | No                          |
| <b>C9-3</b>       | F          | 69                   | <i>C9ORF72</i> | 2300 units      | FTD              | Yes (son with MND)    | 68                  | -                    | Yes                         |

**Supplementary Table 2. Primer sequences and probes for Quantitative Real time PCR**

|                      |                       |
|----------------------|-----------------------|
| MAP1LC3 FOR          | CAGCATCCAACCAAATCCC   |
| MAP1LC3 REV          | GTTGACATGGTCAGGTACAAG |
| P62 FOR              | CCAGAGAGTTCCAGCACAGA  |
| P62 REV              | CCGACTCCATCTGTTCTCA   |
| MT-ND5 FOR           | GCAGCCATTCAAGCAATCCTA |
| MT-ND5 REV           | AGGCGAGGATGAAACCGATAT |
| MT-ND5 MGB FAM probe | ACAACCGTATCGGCG       |

**Supplementary Table 3. Respiratory electron transport chain activity.** Values are expressed as nmol/min/mg protein and normalised with citrate synthase activity.

|                      | Complex I | Complex II | Complex III | Complex IV | Succinate deidrogenase (SDH) |
|----------------------|-----------|------------|-------------|------------|------------------------------|
| <b>CTRL</b>          | 36,9±4,9  | 11,7±1,2   | 66,0±4,9    | 108,9±12,5 | 9,7±0,2                      |
| <b>mTDP-43.A382T</b> | 38,0±7,56 | 14,1±0,3   | 60,7±3,2    | 133,0±7,9  | 11,7±0,6                     |
| <b>mC9ORF73</b>      | 34,9±6,1  | 13,8±0,6   | 76,2±10,0   | 116,2±12,4 | 12,9±1,0                     |
